# Supplementary material for: Steering the crystallization of perovskites for high-performance solar cells in ambient air
Source: Royal Society of Chemistry journal article supplement (doi:10.1039/c9ta02566a), 2019-01-01
Supplement: c9ta02566a1.pdf [file c9ta02566a1.pdf]

## Supporting Information

### Steering the crystallization of perovskites for high performance solar cells in ambient air

Feng Wang, Ting Zhang, Yafei Wang<sup>1</sup>, Detao liu, Peng Zhang, Hao Chen, Long Ji, Li Chen, Zhi David Chen\*, Jiang Wu, Xin Liu, Yanbo Li, Yafei Wang<sup>2</sup> and Shibin Li\*

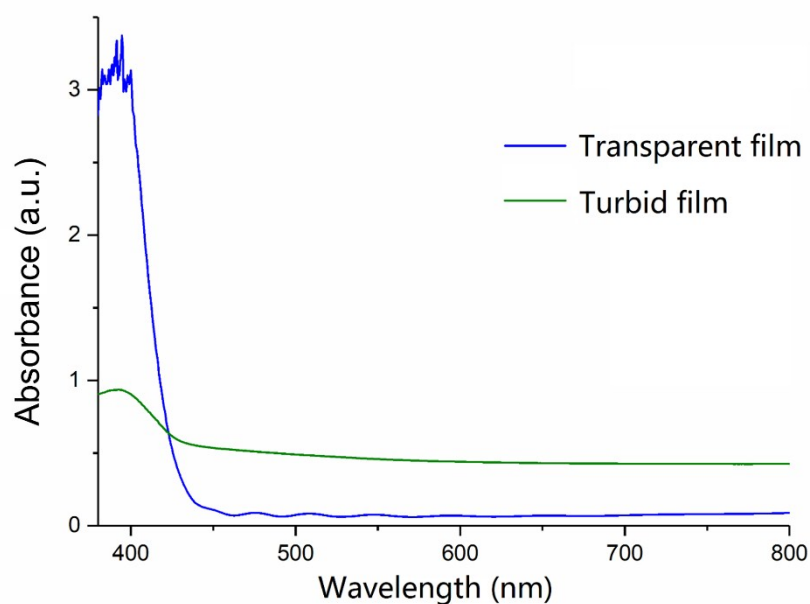

**Supplementary Figure 1. UV-vis absorption characterization.** UV-vis absorption spectra of transparent and turbid MAPbI<sub>3</sub> precursor films prepared in ambient air.

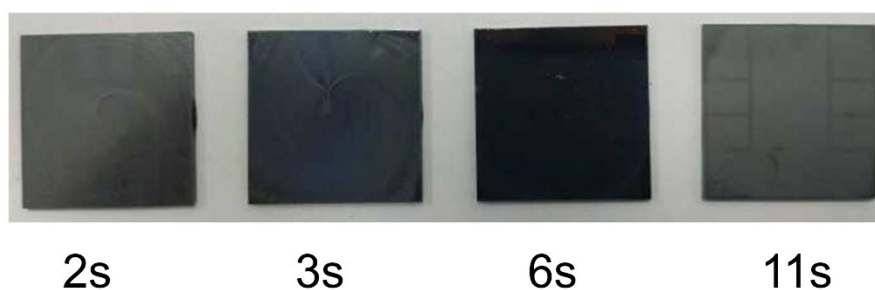

**Supplementary Figure 2. Perovskite films photographs.** MAPbI<sub>3</sub> films prepared using antisolvent method inside the glovebox as antisolvent dropped at different time (2s, 3s, 6s and 11s) after spin-coating starts. Turbid point is at around 9s.

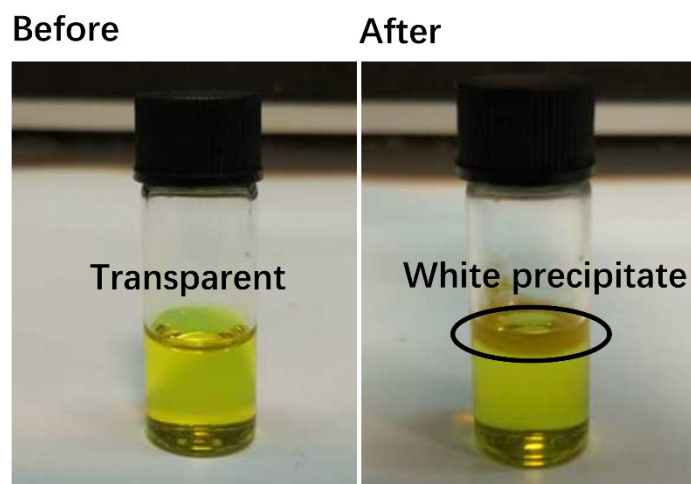

**Supplementary Figure 3. Appearance change of perovskite precursor solutions.** Appearance of perovskite solution (2 mL) before and after the addition of deionized water (~20 uL).

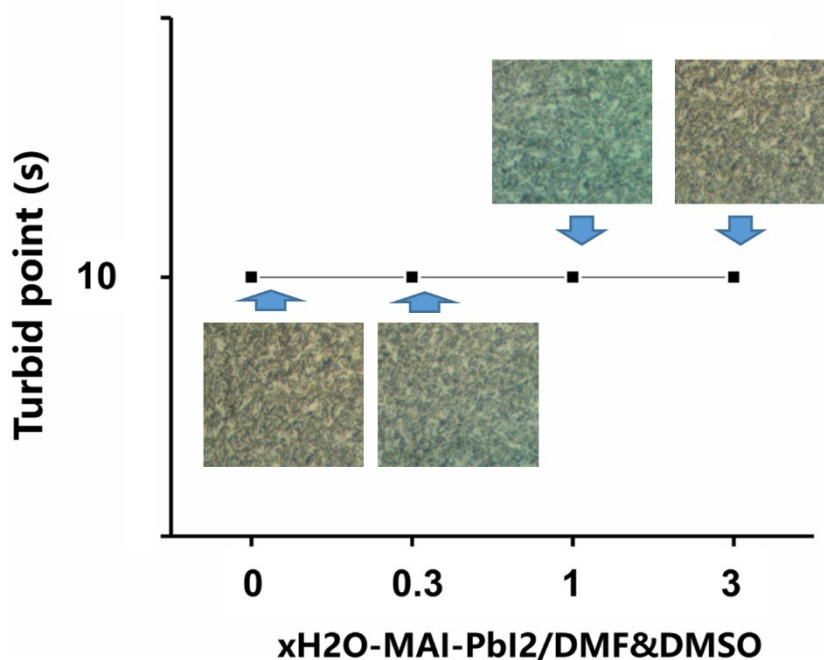

**Supplementary Figure 4. The influence of addition H<sub>2</sub>O on SCIC.** Turbid point and morphology of perovskite films prepared from precursor solutions (equal molar of MAI and PbI<sub>2</sub> in a mixed solvent of DMF and DMSO) with addition of xH<sub>2</sub>O (x=0.3, 1 and 3, molar ratio to MAI).

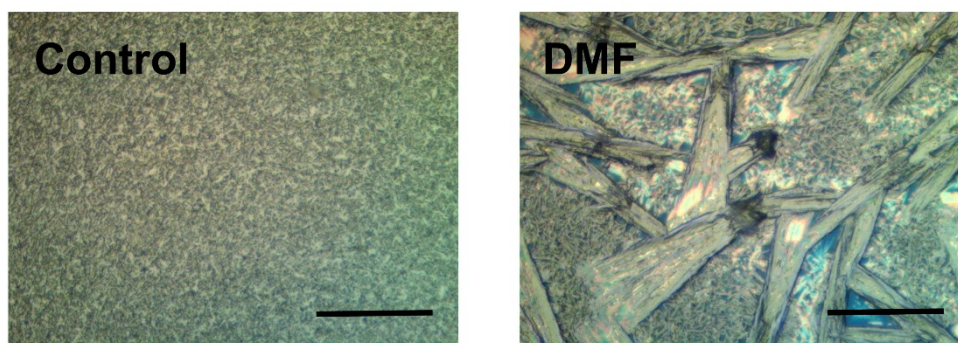

**Supplementary Figure 5. The influence of DMF atmosphere on SCIC.** Morphology of perovskite films obtained by spin-coating with or without (control) DMF atmosphere introduced to the spin-coater chamber.

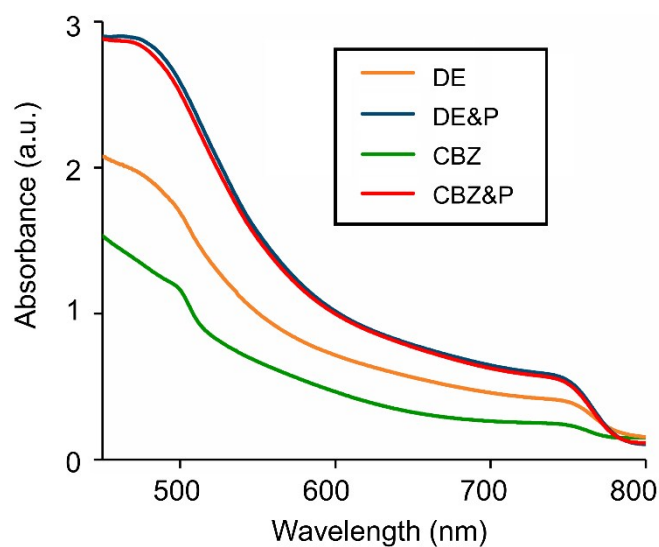

**Supplementary Figure 6. UV-vis absorption characterization.** UV-vis absorption spectra of MAPbI<sub>3</sub> films prepared using antisolvent method with and without preheating. “P” denotes preheating.

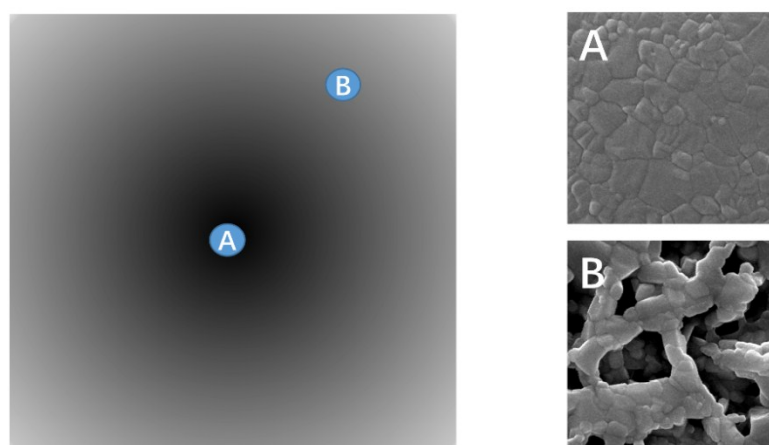

**Supplementary Figure 7. Perovskite films morphology.** Appearance schematic and SEM images of MAPbI<sub>3</sub> films prepared by antisolvent method with preheating using CBZ as antisolvent under 90% RH humid atmosphere. It is shown that the middle area is pinhole free, while the morphology becomes mesoporous near the edge.

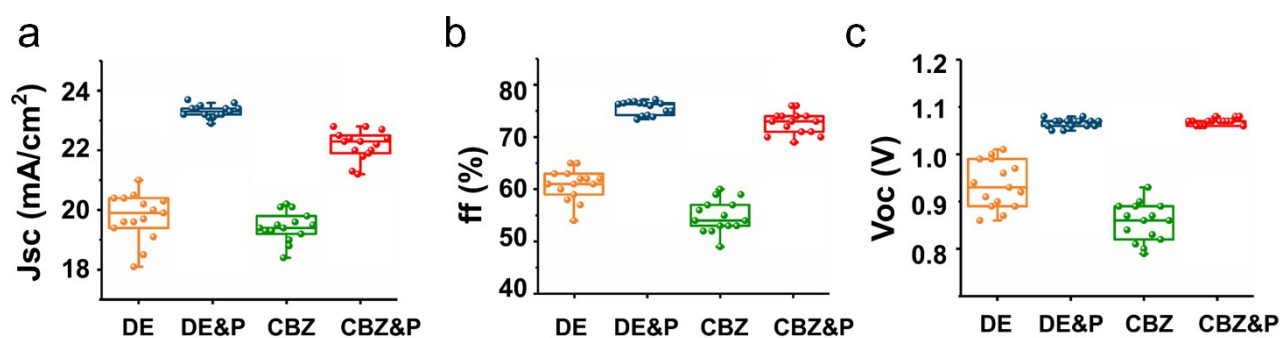

**Supplementary Figure 8. Photovoltaic performance of solar cells.** (a) J<sub>sc</sub>, (b) FF, and (c) V<sub>oc</sub> of PSCs with MAPbI<sub>3</sub> films prepared by antisolvent method with or without preheating using either DE (90% RH) or CBZ (70% RH) as the antisolvent.

**Supplementary Table 1. Summary of cell parameters.** Photovoltaic performance of PSCs fabricated at 0%, 50%, 70% RH atmosphere ( $\sim 25$  °C) using antisolvent method with preheating (70 °C). The antisolvent is DE or CBZ. For each case, the statistical data is obtained from 15 cells.

|     | RH ( $\sim 25$ °C) | $J_{sc}$<br>(mA cm <sup>-2</sup> ) | $V_{oc}$<br>(V) | FF              | PCE<br>(%)     |
|-----|--------------------|------------------------------------|-----------------|-----------------|----------------|
| DE  | 0%                 | 22.4 $\pm$ 0.8                     | 1.06 $\pm$ 0.02 | 0.72 $\pm$ 0.02 | 17.3 $\pm$ 0.7 |
|     | 50%                | 22.6 $\pm$ 0.5                     | 1.07 $\pm$ 0.03 | 0.72 $\pm$ 0.03 | 17.8 $\pm$ 0.5 |
|     | 70%                | 22.8 $\pm$ 0.5                     | 1.07 $\pm$ 0.03 | 0.74 $\pm$ 0.02 | 18.4 $\pm$ 0.6 |
| CBZ | 0%                 | 21.4 $\pm$ 0.8                     | 1.06 $\pm$ 0.02 | 0.72 $\pm$ 0.02 | 16.3 $\pm$ 0.5 |
|     | 50%                | 21.5 $\pm$ 0.7                     | 1.06 $\pm$ 0.02 | 0.73 $\pm$ 0.03 | 16.8 $\pm$ 0.4 |
|     | 70%                | 21.4 $\pm$ 0.6                     | 1.07 $\pm$ 0.02 | 0.74 $\pm$ 0.02 | 17.0 $\pm$ 0.6 |

**Supplementary Table 2. Summary of cell parameters.** Photovoltaic performance of PSCs fabricated at 90% RH atmosphere ( $\sim 25$  °C) using antisolvent method with or without preheating (70 °C). The antisolvent was DE or CBZ. For each case, the statistical data was obtained from 15 cells.

|     | Preheating | $J_{sc}$<br>(mA cm <sup>-2</sup> ) | $V_{oc}$<br>(V) | FF              | PCE<br>(%)     |
|-----|------------|------------------------------------|-----------------|-----------------|----------------|
| DE  | Without    | 19.8 $\pm$ 1.6                     | 0.93 $\pm$ 0.08 | 0.60 $\pm$ 0.08 | 11.2 $\pm$ 0.7 |
|     | with       | 23.2 $\pm$ 0.6                     | 1.07 $\pm$ 0.02 | 0.75 $\pm$ 0.02 | 18.7 $\pm$ 0.7 |
| CBZ | Without    | 19.4 $\pm$ 0.9                     | 0.86 $\pm$ 0.07 | 0.55 $\pm$ 0.07 | 9.2 $\pm$ 0.5  |
|     | with       | 22.1 $\pm$ 1.0                     | 1.07 $\pm$ 0.02 | 0.72 $\pm$ 0.03 | 17.1 $\pm$ 0.5 |
